# Supplementary material for: Simultaneous templating of polymer nanocapsules and entrapped silver nanoparticles
Source: Royal Society of Chemistry journal article supplement (doi:10.1039/c0cc01988g), 2010-01-01
Supplement: c0cc01988g.pdf [file c0cc01988g.pdf]

## Simultaneous Templating of Polymer Nanocapsules and Entrapped Silver Nanoparticles

Sergey Shmakov and Eugene Pinkhassik

### Supplementary Information

#### Chemicals

All solvents used were HPLC grade. 1,2-dimyristoyl-sn-glycero-3-phosphocholine (DMPC) was purchased from Avanti Polar Lipids, Inc. as a dry powder. p-divinylbenzene (DVB), tert-Butylstyrene (tBuSt), methanol and Sephadex G-50 (medium) were purchased from Sigma-Aldrich. DVB and tBuSt were passed through alumina column to remove the inhibitor. Sephadex G-50 (10 g) was swollen in 120 mL of water in a glass screw-capped bottle for at least 5 h at room temperature and stored at 4 °C until required for use. All other chemicals were not further purified before use.

#### Synthesis of nanocapsules with entrapped silver nanoparticles

Nanocapsules with entrapped silver nanoparticles were prepared by the following procedure: tert-Butylstyrene (24  $\mu\text{L}$ ,  $1.33 \times 10^{-5}$  mol), p-divinylbenzene (19  $\mu\text{L}$ ,  $1.33 \times 10^{-5}$  mol), and 2,2-dimethoxy-2-phenylacetophenone, DMPA, (UV initiator; 0.33 mg,  $1.3 \times 10^{-6}$  mol) were added to a solution of DMPC (60 mg,  $8.85 \times 10^{-5}$  mol) in  $\text{CHCl}_3$ . The monomers were purified on a column of neutral alumina prior to addition. The  $\text{CHCl}_3$  was evaporated using a stream of purified argon to form a lipid-monomer film on the wall of a culture tube. The film was further dried under vacuum for 30 min to remove traces of  $\text{CHCl}_3$ . The dried film was hydrated with  $10^{-2}$  mol solution of  $\text{AgNO}_3$  in deionized water to give a dispersion of multilamellar vesicles, which was then extruded at 35 °C through a polycarbonate Nucleopore track-etch membrane (Whatman) with 0.1- $\mu\text{m}$  pore size using a Lipex stainless steel extruder (Northern Lipids). Prior to polymerization, unloaded silver ions were removed from the mixture by size-exclusion chromatography on Sephadex G-50 column. Oxygen was removed by passing purified argon through the solution. The sample was irradiated ( $\lambda=254$  nm) in a photochemical reactor equipped with a stirrer (10 lamps of 32 W each; 10-cm distance between the lamps and the sample) for 60 min. Methanol (10 mL) was added, and the precipitate was washed 3-5 times with methanol.

For DLS measurements and UV-spectroscopy prepared nanocapsules were resuspended in Triton X-100 solution in water (0.5 mL, 2 %) by stirring for 1 h at ambient temperature.

For XRD study nanocapsules were resuspended in benzene, and freeze-dried.

#### X-Ray Diffraction Measurements

XRD spectra were collected on a Bruker D8 Advance X-ray diffractometer using Cu K $\alpha$  radiation at 40 kV and 40 mA. The diffraction pattern were obtained in the  $2\theta$  scan range 30-75° with a step size of 0.05 and a time/step of 0.2 s.

#### Transmission Electron Microscopy (TEM)

TEM images were acquired on a JEOL JEM1200EXII microscope. Samples were negatively stained with phosphotungstic acid (pH 5.9) on a carbon grid.

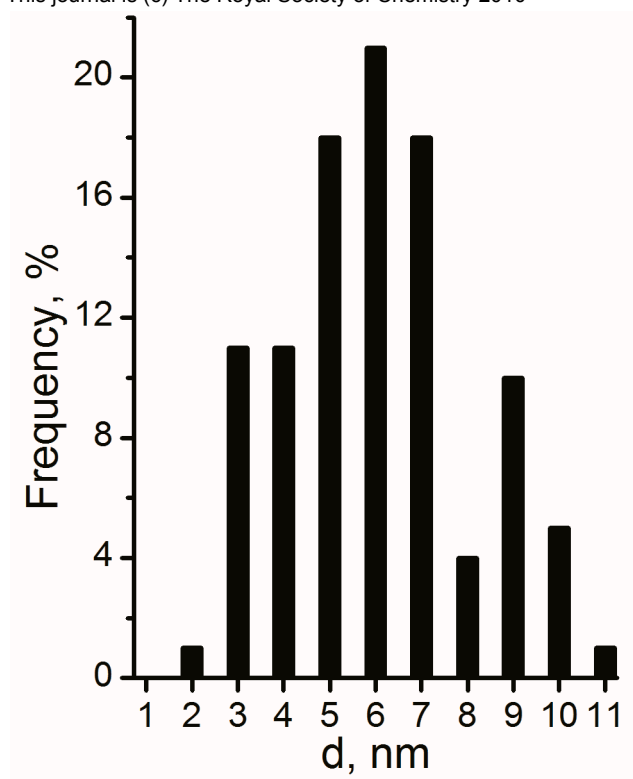

Figure 1. Size distribution of entrapped Ag NPs.

Mean diameter of Ag NPs is 5.5 and standard deviation is 2.0. Calculation was carried out for 300 NPs from 4 different TEM pictures.

### Dynamic Light Scattering (DLS)

Hydrodynamic diameter measurements were performed on a Malvern Nano-ZS zetasizer (Malvern Instruments Ltd., Worcestershire, U.K.). The Helium–Neon laser, 4mW, operates at 633 nm, with the scatter angle fixed at 173°, and the temperature at 25 °C. 80  $\mu$ L samples were taken from the reaction vials with a pipet and were placed into disposable cuvettes without dilution (70  $\mu$ L, 8.5 mm center height Brand UV-Cuvette micro). At least 10 scans were collected from each sample.

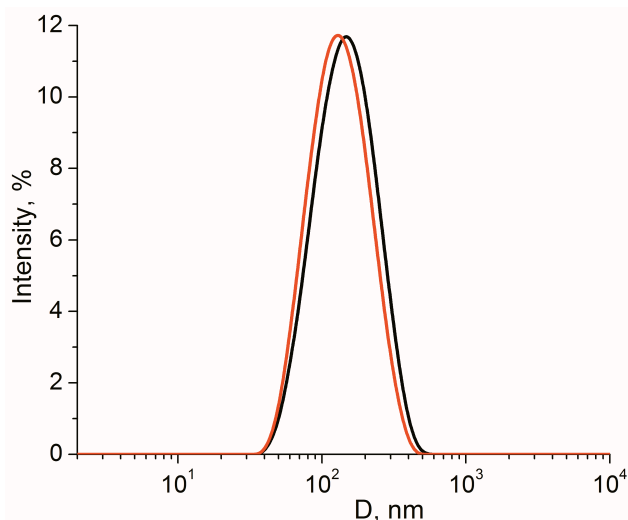

Figure 2. DLS curves for organic NCs containing silver NPs before UV irradiation (red) and after (black).

### UV/VIS Spectroscopy

UV spectra were recorded on Agilent Technologies 8453 UV spectrophotometer in quartz cuvette in the range 200-700 nm.

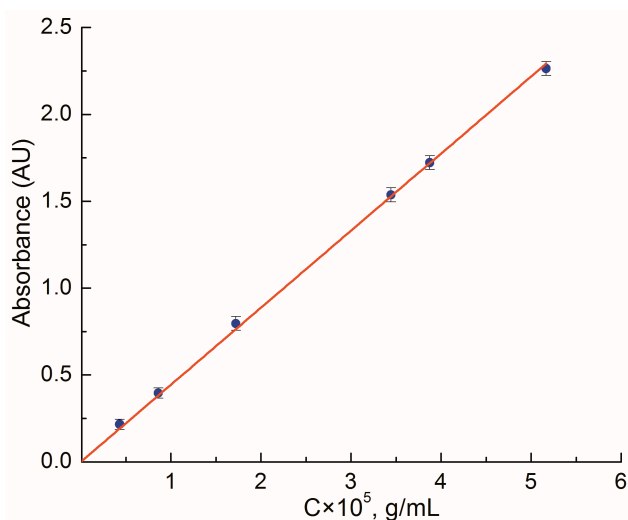

Figure 3. Calibration plot for DMPA dilution in methanol

Molar extinction coefficient ( $\epsilon$ ) for 2,2-dimethoxy-2-phenylacetophenone in MeOH was determined (at  $\lambda_{\text{max}}=253$  nm) to be  $12200 \pm 100$  L mol<sup>-1</sup> cm<sup>-1</sup>.
